# Supplementary material for: Development of an adverse drug event network to predict drug toxicity
Source: PubMed Central journal article supplement — Curr Res Toxicol. 2020 Jun 11;1:48–55. doi: 10.1016/j.crtox.2020.06.001 (PMC8320634; doi:10.1016/j.crtox.2020.06.001), 2020-06-11
Supplement: mmc1.pdf [file mmc1.pdf]

## **Supplementary materials**

### **Development of an adverse drug reaction network to predict drug toxicity**

Qier Wu, Olivier Taboureau, Karine Audouze

#### **Contents:**

Figure S1: The hierarchical structure of MedDRA and the list of 27 SOC

Figure S2: Examples of the pull-down score (pullS)

Table S1: Identified adverse effects for safinamide

Table S2: ADEs reported in FDA pre-marketing reports for safinamide

Table S3: Identified adverse effects for sonidegib

Table S4: ADEs reported in FDA pre-marketing reports for sonidegib

Table S5: Identified adverse effects for rufinamide

Table S6: ADEs reported in FDA pre-marketing reports for rufinamide

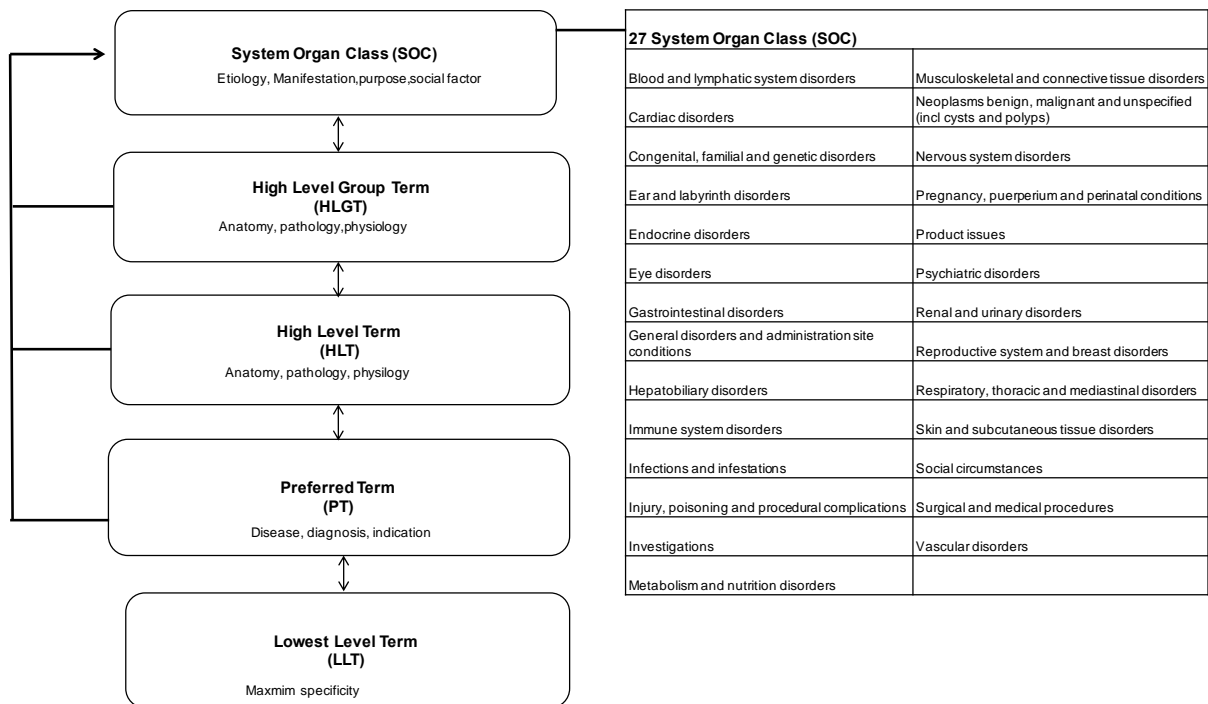

**Fig S1: The hierarchical structure of MedDRA and the list of 27 SOC.** The structure of element of MedDRA was a five-tiered hierarchy of terms. Each term provided the different requirement of specificity. Lowest Level Term (LLT) had the maximum specificity. Every subordinate level was linked to more than one superordinate term (For example: LLT were subordinate to PT which means one LLT was linked to more than one PT). System Organ Class (SOC) that was the highest level in MedDRA terminology. Due to its multi-axiality characteristic, it allowed a term to be represented in more than one SOC, except LLT.

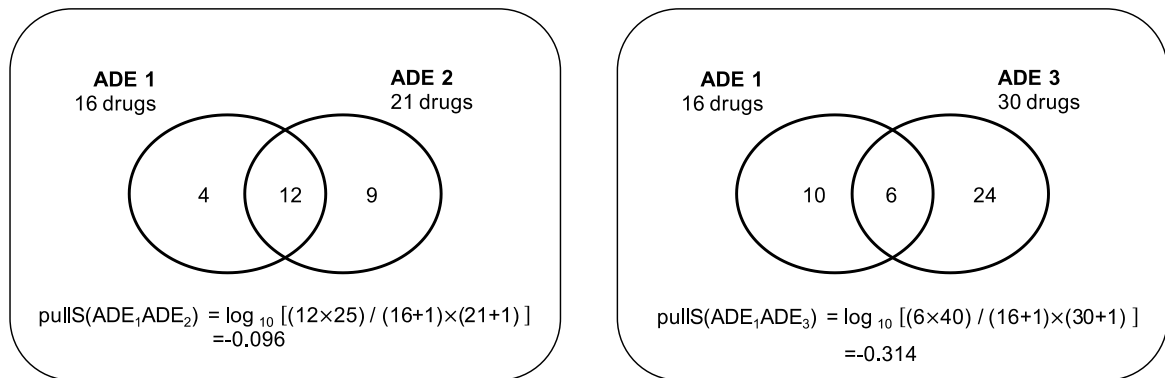

**Figure S2: Examples of the pull-down score (pullS).** PullS were calculated between each pair of ADE in order to prioritize uncharacterized ADEs that are more likely to occur for a drug, using as input its known ADEs. The Venn-diagrams show two examples involving three ADEs. The values represent the number of drugs connected to either ADE1, ADE2, ADE3. The pullS for ADE1-ADE2 and for ADE1-ADE3 are calculated as shown. In this example, the pullS indicates that there is more confidence in the association ADE1-ADE2, than in the ADE1-ADE3 association.

**Table S1: Identified adverse effects for safinamide.** List of the most significant adverse drug effects (ADEs) identified by our approach using the pull-down score system (PullS) and the developed ADE model. In grey, the predicted ADEs for which no literature support was found.

| Known ADE                          | Predicted ADEs                  | PullS  | Reference |
|------------------------------------|---------------------------------|--------|-----------|
| Parkinsonism_hyperpyrexia_syndrome | Sudden_onset_of_sleep           | -0,967 | [1]       |
|                                    | Compulsive_shopping             | -1,028 | [1,2]     |
|                                    | Jealous_delusion                | -1,030 | [3]       |
|                                    | Dopamine_dysregulation_syndrome | -1,032 | -         |
|                                    | Compulsive_sexual_behaviour     | -1,053 | [1,2]     |
|                                    | On_and_off_phenomenon           | -1,089 | [2]       |
|                                    | Gambling_disorder               | -1,097 | [1,2]     |
|                                    | Impulse-control_disorder        | -1,098 | [1,2]     |
|                                    | Hypersexuality                  | -1,139 | [1,2]     |
|                                    | Stereotypy                      | -1,209 | [2–5]     |
|                                    | Impulsive_behaviour             | -1,219 | [1,2]     |
|                                    | Bradykinesia                    | -1,226 | [2–5]     |
|                                    | Obsessive-compulsive_disorder   | -1,226 | [1,2]     |
|                                    | Neuroleptic_malignant_syndrome  | -1,227 | [2,6,7]   |
|                                    | Parkinsonism                    | -1,227 | [2]       |
|                                    | Drug_withdrawal_syndrome        | -1,230 | [2,6,7]   |
|                                    | Parkinson's_disease             | -1,230 | [2]       |
|                                    | Muscle_rigidity                 | -1,230 | [2,6,7]   |
|                                    | Delusion                        | -1,231 | [3]       |
|                                    | Psychomotor_hyperactivity       | -1,232 | [2]       |

**Table S2: ADEs reported in FDA pre-marketing reports for safinamide.** All predicted ADEs were considered, independently of the significance of the pull-down score.

| Drug       | Predicted ADEs indicated in FDA reports | PullS  | Reference |
|------------|-----------------------------------------|--------|-----------|
| Safinamide | Impulsive_behaviour                     | -1,219 | [2]       |
|            | Dyskinesia                              | -1,234 | [2]       |
|            | Orthostatic_hypotension                 | -1,236 | [2]       |

|  |                    |        |     |
|--|--------------------|--------|-----|
|  | Psychotic_disorder | -1,236 | [2] |
|  | Agitation          | -1,238 | [2] |
|  | Hallucination      | -1,238 | [2] |
|  | Feeling_abnormal   | -1,240 | [2] |
|  | Fall               | -1,241 | [2] |
|  | Nausea             | -1,241 | [2] |
|  | Insomnia           | -1,241 | [2] |
|  | Drug_interaction   | -1,241 | [2] |
|  | Confusional_state  | -1,241 | [2] |

**Table S3: Identified adverse effects for sonidegib.** List of the most significant adverse drug effects (ADEs) identified by our approach using the pull-down score system (PullS) and the developed ADE model. In grey, the predicted ADEs for which no literature support was found.

| Known ADE           | Predicted ADEs                           | PullS                 | Reference |
|---------------------|------------------------------------------|-----------------------|-----------|
| Febrile_neutropenia | Nicotinic_acid_deficiency                | -4,96 <sup>e-04</sup> | -         |
|                     | Lower_respiratory_tract_infection_fungal | -0,724                | [8]       |
|                     | Juvenile_melanoma_benign                 | -0,898                | [8]       |
|                     | Chronic_lymphocytic_leukaemia_recurrent  | -0,898                | -         |
|                     | Differentiation_syndrome                 | -0,966                | [9]       |
|                     | Neutropenia                              | -1,033                | [10]      |
|                     | Pyrexia                                  | -1,071                | [8]       |
|                     | Thrombocytopenia                         | -1,072                | -         |
|                     | Focal_nodular_hyperplasia                | -1,083                | -         |
|                     | Mucosal_inflammation                     | -1,092                | -         |
|                     | Sepsis                                   | -1,100                | [11]      |
|                     | Richter's_syndrome                       | -1,106                | -         |
|                     | Pneumonia                                | -1,112                | [8]       |
|                     | Disease_progression                      | -1,123                | [12]      |
|                     | Anaemia                                  | -1,125                | -         |
|                     | Bone_marrow_failure                      | -1,151                | -         |
|                     | Pancytopenia                             | -1,157                | -         |
|                     | Diarrhoea                                | -1,164                | [12]      |
|                     | Platelet_count_decreased                 | -1,165                | -         |
|                     | Vomiting                                 | -1,167                | [12]      |

**Table S4: ADEs reported in FDA pre-marketing reports for sonidegib.** All predicted ADEs were considered, independently of the significance of the pull-down score.

| Drug      | Predicted ADEs indicated in FDA reports | PullS  | Reference |
|-----------|-----------------------------------------|--------|-----------|
| Sonidegib | Diarrhoea                               | -1,164 | [12]      |
|           | Nausea                                  | -1,174 | [12]      |
|           | Vomiting                                | -1,167 | [12]      |
|           | Decreased_appetite                      | -1,222 | [12]      |
|           | Fatigue                                 | -1,234 | [12]      |
|           | Abdominal_pain                          | -1,289 | [12]      |
|           | Weight_decreased                        | -1,360 | [12]      |
|           | Headache                                | -1,389 | [12]      |
|           | Pain                                    | -1,402 | [12]      |
|           | Pruritus                                | -1,474 | [12]      |
|           | Alopecia                                | -1,485 | [12]      |
|           | Myalgia                                 | -1,537 | [12]      |
|           | Dysgeusia                               | -1,618 | [12]      |
|           | Muscle_spasms                           | -1,700 | [12]      |
|           | Musculoskeletal_pain                    | -1,811 | [12]      |
|           | Foetal death                            | -2,012 | [12]      |
|           | Teratogenicity                          | -2,133 | [12]      |

**Table S5: Identified adverse effects for rufinamide.** List of the most significant adverse drug effects (ADEs) identified by our approach using the pull-down score system (PullS) and the developed ADE model. In grey, the predicted ADEs for which no literature support was found.

| Known ADEs | Predicted ADEs                     | PullS                 | Reference |
|------------|------------------------------------|-----------------------|-----------|
| Seizure    | Product_tampering                  | -2,81 <sup>e-04</sup> | -         |
|            | Postictal_psychosis                | -0,125                | -         |
|            | Infantile_spasms                   | -0,301                | [13]      |
|            | Drug_dose_titration_not_performed  | -0,397                | [14]      |
|            | Cerebrospinal_fluid_leakage        | -0,668                | -         |
|            | Neuroblastoma                      | -0,918                | [13,15]   |
|            | Anomaly_of_external_ear_congenital | -0,951                | [16]      |

|                    |                                     |        |         |
|--------------------|-------------------------------------|--------|---------|
|                    | Selective_abortion                  | -0,951 | [13]    |
|                    | Hyponatraemic_seizure               | -0,951 | -       |
|                    | Proctitis                           | -0,967 | -       |
|                    | Tongue_blistering                   | -0,973 | -       |
|                    | Vomiting                            | -0,980 | [13]    |
|                    | Confusional_state                   | -0,989 | [17]    |
|                    | Hordeolum                           | -0,997 | -       |
|                    | Toxicity_to_various_agents          | -1,001 | [13,18] |
|                    | Nausea                              | -1,005 | [13]    |
|                    | Drug_ineffective                    | -1,012 | [19,20] |
|                    | Somnolence                          | -1,019 | [13]    |
|                    | Hypotension                         | -1,020 | [17]    |
|                    | Drug_interaction                    | -1,023 | [13]    |
| Status_epilepticus | Clonic_convulsion                   | -1,047 | [17]    |
|                    | Psychogenic_seizure                 | -1,166 | -       |
|                    | Congenital_intestinal_malformation  | -1,243 | [13]    |
|                    | Generalised_tonic-clonic_seizure    | -1,352 | [13,21] |
|                    | Seizure                             | -1,359 | [13,21] |
|                    | Myoclonus                           | -1,367 | [13,21] |
|                    | Congenital_herpes_simplex_infection | -1,369 | [13,22] |
|                    | Dyskinesia                          | -1,373 | [23]    |
|                    | Drug_ineffective                    | -1,384 | [19,20] |
|                    | Muscle_contracture                  | -1,392 | [13,21] |
|                    | Confusional_state                   | -1,403 | [17]    |
|                    | Vomiting                            | -1,415 | [13]    |
|                    | Pyrexia                             | -1,418 | [17]    |
|                    | Condition_aggravated                | -1,422 | [13,21] |
|                    | Epilepsy                            | -1,426 | [13,21] |
|                    | Toxicity_to_various_agents          | -1,426 | [13,18] |
|                    | Depressed_level_of_consciousness    | -1,427 | [13]    |
|                    | Drug_interaction                    | -1,428 | [13]    |
|                    | Tremor                              | -1,429 | [23]    |
|                    | Coma                                | -1,432 | [17]    |

**Table S6: ADEs reported in FDA pre-marketing reports for rufinamide.** All predicted ADEs were considered, independently of the significance of the pull-down score.

| Drug | Predicted ADEs indicated in FDA reports | PullIS | Reference |
|------|-----------------------------------------|--------|-----------|
|------|-----------------------------------------|--------|-----------|

|            |                                     |        |      |
|------------|-------------------------------------|--------|------|
| Rufinamide | Postictal_psychosis                 | -0,125 | [13] |
|            | Nausea                              | -1,005 | [13] |
|            | Completed_suicide                   | -1,054 | [13] |
|            | Headache                            | -1,062 | [13] |
|            | Dizziness                           | -1,064 | [13] |
|            | Fatigue                             | -1,097 | [13] |
|            | Decreased appetite                  | -1,105 | [13] |
|            | Electrocardiogram_QT_prolonged      | -1,112 | [13] |
|            | Multiple_organ_dysfunction_syndrome | -1,197 | [13] |
|            | Neutropenia                         | -1,230 | [13] |
|            | Leukopenia                          | -1,267 | [13] |
|            | Urinary incontinence                | -1,345 | [13] |
|            | Somnolence                          | -1,445 | [13] |
|            | Increased appetite                  | -1,594 | [13] |
|            | Thrombocytopenia                    | -1,612 | [13] |
|            | Bundle branch block right           | -1,622 | [13] |
|            | Atrioventricular block first degree | -1,632 | [13] |
|            | Pollakiuria                         | -1,653 | [13] |
|            | Dermatitis allergic                 | -1,662 | [13] |
|            | Nephrolithiasis                     | -1,679 | [13] |
|            | Dysuria                             | -1,761 | [13] |
|            | Lymphadenopathy                     | -1,782 | [13] |
|            | Enuresis                            | -1,797 | [13] |
|            | Polyuria                            | -2,206 | [13] |

## References

- [1] M. Fabbri, M.M. Rosa, D. Abreu, J.J. Ferreira, Clinical pharmacology review of safinamide for the treatment of Parkinson's disease, *Neurodegenerative Disease Management*. 5 (2015) 481–496. <https://doi.org/10.2217/nmt.15.46>.
- [2] FDA drug label,XADAGO (safinamide) tablets, for oral use.pdf, (n.d.). [https://www.accessdata.fda.gov/drugsatfda\\_docs/label/2017/207145lbl.pdf](https://www.accessdata.fda.gov/drugsatfda_docs/label/2017/207145lbl.pdf) (accessed March 11, 2020).
- [3] CENTER FOR DRUG EVALUATION AND RESEARCH XADAGO (SAFINAMIDE) MEDICAL REVIEW(S),(n.d.).[https://www.accessdata.fda.gov/drugsatfda\\_docs/nda/2017/207145Orig1s000MedR.pdf](https://www.accessdata.fda.gov/drugsatfda_docs/nda/2017/207145Orig1s000MedR.pdf) (accessed March 11, 2020).
- [4] xadago-epar-public-assessment-report\_en.pdf,(n.d.).



[https://www.ema.europa.eu/en/documents/assessment-report/xadago-epar-public-assessment-report\\_en.pdf](https://www.ema.europa.eu/en/documents/assessment-report/xadago-epar-public-assessment-report_en.pdf) (accessed March 11, 2020).

- [5] A.H.V. Schapira, S.H. Fox, R.A. Hauser, J. Jankovic, W.H. Jost, C. Kenney, J. Kulisevsky, R. Pahwa, W. Poewe, R. Anand, Assessment of Safety and Efficacy of Safinamide as a Levodopa Adjunct in Patients With Parkinson Disease and Motor Fluctuations: A Randomized Clinical Trial, *JAMA Neurol.* 74 (2017) 216–224. <https://doi.org/10.1001/jamaneurol.2016.4467>.
- [6] A. Marquet, K. Kupas, A. Johne, B. Astruc, A. Patat, S. Krösser, A. Kovar, The Effect of Safinamide, a Novel Drug for Parkinson’s Disease, on Pressor Response to Oral Tyramine: A Randomized, Double-Blind, Clinical Trial, *Clinical Pharmacology & Therapeutics.* 92 (2012) 450–457. <https://doi.org/10.1038/clpt.2012.128>.
- [7] A randomized, double-blind, placebo-controlled trial of safinamide as add-on therapy in early Parkinson’s disease patients - Stocchi - 2012 - *Movement Disorders* - Wiley Online Library, (n.d.). <https://onlinelibrary.wiley.com/doi/full/10.1002/mds.23954> (accessed March 12, 2020).
- [8] CENTER FOR DRUG EVALUATION AND RESEARCH, MEDICAL REVIEW, SONIDEGIB.pdf, (n.d.). [https://www.accessdata.fda.gov/drugsatfda\\_docs/nda/2015/205266Orig1s000MedR.pdf](https://www.accessdata.fda.gov/drugsatfda_docs/nda/2015/205266Orig1s000MedR.pdf) (accessed March 11, 2020).
- [9] N.J. Collier, F.R. Ali, J.T. Lear, The safety and efficacy of sonidegib for the treatment of locally advanced basal cell carcinoma, *Expert Review of Anticancer Therapy.* 16 (2016) 1011–1018. <https://doi.org/10.1080/14737140.2016.1230020>.
- [10] M.C. Pietanza, A.M. Litvak, A.M. Varghese, L.M. Krug, M. Fleisher, J.B. Teitcher, A.I. Holodny, C.S. Sima, K.M. Woo, K.K. Ng, H.H. Won, M.F. Berger, M.G. Kris, C.M. Rudin, A phase I trial of the Hedgehog inhibitor, sonidegib (LDE225), in combination with etoposide and cisplatin for the initial treatment of extensive stage small cell lung cancer, *Lung Cancer.* 99 (2016) 23–30. <https://doi.org/10.1016/j.lungcan.2016.04.014>.

- [11] J.T. Lear, M.R. Migden, K.D. Lewis, A.L.S. Chang, A. Guminski, R. Gutzmer, L. Dirix, P. Combemale, A. Stratigos, R. Plummer, H. Castro, T. Yi, M. Mone, J. Zhou, U. Trefzer, M. Kaatz, C. Loquai, R. Kudchadkar, D. Sellami, R. Dummer, Long-term efficacy and safety of sonidegib in patients with locally advanced and metastatic basal cell carcinoma: 30-month analysis of the randomized phase 2 BOLT study, *Journal of the European Academy of Dermatology and Venereology*. 32 (2018) 372–381. <https://doi.org/10.1111/jdv.14542>.
- [12] FDA drug label ODOMZO(sonidegib), capsule, for oral use, (n.d.). [https://www.accessdata.fda.gov/drugsatfda\\_docs/label/2017/205266s004lbl.pdf](https://www.accessdata.fda.gov/drugsatfda_docs/label/2017/205266s004lbl.pdf) (accessed March 11, 2020).
- [13] FDA drug label BANZEL(rufinamide), oral suspension, (n.d.). [https://www.accessdata.fda.gov/drugsatfda\\_docs/label/2015/021911s012lbl.pdf](https://www.accessdata.fda.gov/drugsatfda_docs/label/2015/021911s012lbl.pdf) (accessed March 11, 2020).
- [14] J.W. Wheless, B. Vazquez, Rufinamide: A Novel Broad-Spectrum Antiepileptic Drug, *Epilepsy Curr*. 10 (2010) 1–6. <https://doi.org/10.1111/j.1535-7511.2009.01336.x>.
- [15] G. Singh, P.H. Driever, J.W. Sander, Cancer risk in people with epilepsy: the role of antiepileptic drugs, *Brain*. 128 (2005) 7–17. <https://doi.org/10.1093/brain/awh363>.
- [16] S. Kaneko, D. Battino, E. Andermann, K. Wada, R. Kan, A. Takeda, Y. Nakane, Y. Ogawa, G. Avanzini, C. Fumarola, T. Granata, F. Molteni, G. Pardi, L. Minotti, R. Canger, L. Dansky, M. Oguni, I. Lopes-Cendes, A. Sherwin, F. Andermann, M.H. Seni, M. Okada, T. Teranishi, Congenital malformations due to antiepileptic drugs, *Epilepsy Research*. 33 (1999) 145–158. [https://doi.org/10.1016/S0920-1211\(98\)00084-9](https://doi.org/10.1016/S0920-1211(98)00084-9).
- [17] CENTER FOR DRUG EVALUATION AND RESEARCH ,MEDICAL REVIEW(S),RUFINAMIDE,(n.d.).[https://www.accessdata.fda.gov/drugsatfda\\_docs/nda/2011/201367Orig1s000MedR.pdf](https://www.accessdata.fda.gov/drugsatfda_docs/nda/2011/201367Orig1s000MedR.pdf) (accessed March 11, 2020).
- [18] F.P. Guengerich, Mechanisms of Drug Toxicity and Relevance to Pharmaceutical Development, *Drug Metab Pharmacokinet*. 26 (2011) 3–14.

- [19] J.Y. Kim, C.G. Lee, H.J. Yu, S.H. Nam, J. Lee, M. Lee, The Efficacy and Tolerability of Rufinamide in Intractable Pediatric Epilepsy, *J Epilepsy Res.* 2 (2012) 33–37. <https://doi.org/10.14581/jer.12009>.
- [20] P.N. Patsalos, B.F.D. Bourgeois, *The Epilepsy Prescriber's Guide to Antiepileptic Drugs*, Cambridge University Press, 2010.
- [21] I. Conradsen, M. Moldovan, P. Jennum, P. Wolf, D. Farina, S. Beniczky, Dynamics of muscle activation during tonic–clonic seizures, *Epilepsy Research.* 104 (2013) 84–93. <https://doi.org/10.1016/j.eplepsyres.2012.09.004>.
- [22] N.D. Fernandes, T. Badri, Congenital Herpes Simplex, in: *StatPearls*, StatPearls Publishing, Treasure Island (FL), 2020. <http://www.ncbi.nlm.nih.gov/books/NBK507897/> (accessed March 12, 2020).
- [23] A.M.S. Alsaad, G. Koren, Exposure to rufinamide and risks of CNS adverse events in drug-resistant epilepsy: a meta-analysis of randomized, placebo-controlled trials, *British Journal of Clinical Pharmacology.* 78 (2014) 1264–1271. <https://doi.org/10.1111/bcp.12479>.
